# Supplementary material for: Dual-atom-site Cu@PCN photocatalyst selectively produces ethane from CO2 reduction
Source: Royal Society of Chemistry journal article supplement (doi:10.1039/d4cy00156g), 2024-01-01
Supplement: d4cy00156g1.pdf [file d4cy00156g1.pdf]

## Supplementary Information

### Dual-Atom-Site Cu@PCN Photocatalyst Selectively Produces Ethane from CO<sub>2</sub> Reduction

Xin Cao<sup>a#</sup>, Chun-Yu Liu<sup>b#</sup>, Yuming Dong<sup>a,\*</sup>, Tingyu Yang<sup>a</sup>, Xinying Chen<sup>a</sup>, Yongfa Zhu<sup>c, a</sup>

<sup>a</sup> International Joint Research Center for Photo-responsive Molecules and Materials, School of Chemical and Material Engineering, Jiangnan University, Wuxi, 214122, China.

<sup>b</sup> Key Laboratory of Eco-Textiles, College of Textile Science and Engineering, Jiangnan University, Wuxi, 214122, China.

<sup>c</sup> Department of Chemistry, Tsinghua University, Beijing, 100084, China.

# Equal contribution

\* Corresponding authors: Prof. Yuming Dong: dongym@jiangnan.edu.cn

### Supplementary Notes

#### In-situ EPR measurements

Before testing, it was necessary to create a 2 mg/mL DAS-Cu@PCN suspension (dispersed into methanol). Following argon bubbling, aqueous methanol solution dispersions were analyzed in sealed quartz tubes for the "before photoactivation sample." After argon bubbling, the sealed quartz tube designated as the "after photoactivation sample" was exposed to Xe lamp radiation for 30 minutes. O<sub>2</sub> gas was purged for 30 minutes into the "after photoactivation sample" to create the "after regeneration sample." Before conducting EPR measurements, all quartz tubes were frozen and kept in liquid nitrogen to maintain 77 K.

#### Tauc calculation formula

$$(\alpha hv)^{1/n} = B(hv - E_g)$$

Where  $\alpha$  is the absorption coefficient,  $h\nu$  is the photon energy,  $h$  is the Planck constant ( $h \approx 4.13567 \times 10^{-15} \text{ eV}\cdot\text{s}$ ),  $\nu$  is the incident photon frequency ( $\nu = c / \lambda$ , where  $c$  is the speed of light,  $c \approx 3 \times 10^8 \text{ m/s}$ ,  $\lambda$  is the wavelength of the incident light),  $B$  is the proportional constant, and  $E_g$  is the band gap width of semiconductor materials.

**The band edge positions of catalyst can be calculated using the following equation:**

$$E_{CB} = (V \text{ vs. NHE}) = E_{fb}(V \text{ vs. AgCl/Ag}) + 0.197 - X$$

$$E_{VB} = E_{CB} + E_g$$

Where  $E_{VB}$  and  $E_{CB}$  stand for the valence band edge potential and conduction band edge potential, respectively;  $E_{Ag/AgCl} = 0.197 \text{ V}$  (saturated potassium chloride) vs. NHE;  $X$  is the voltage difference between the conduction band value and the flat potential value, generally 0.1-0.2 eV (the conduction bands of n-type semiconductors are normally 0.1-0.2 eV deeper than the flat-band potential), which is set as 0.2 eV in this work.

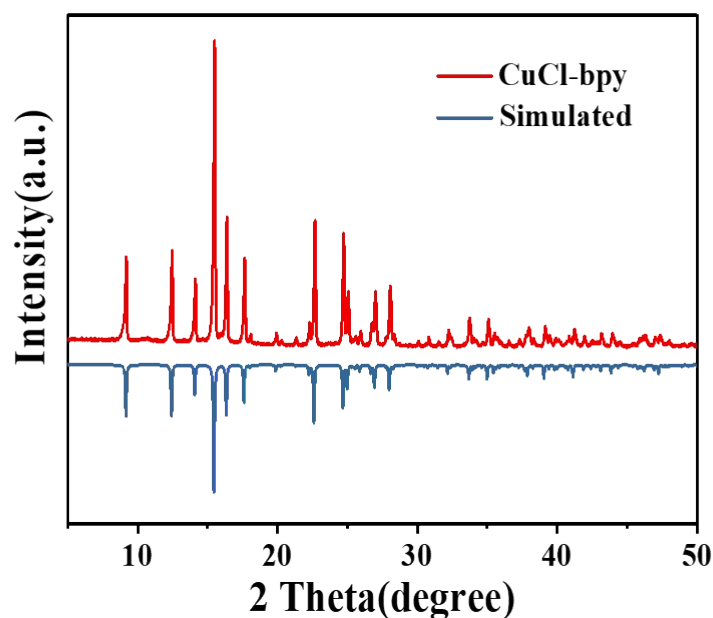

Fig. S1 XRD of CuCl-bpy

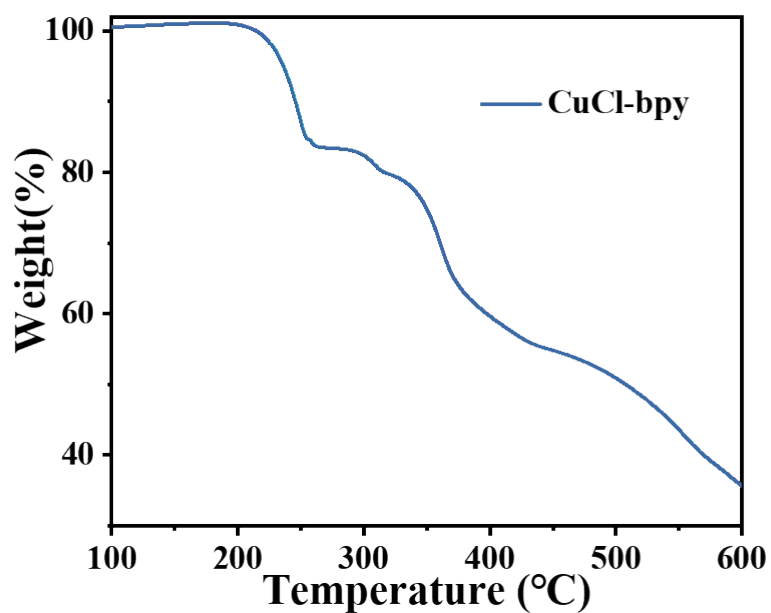

Fig. S2 TGA for CuCl-bpy under N<sub>2</sub> atmosphere.

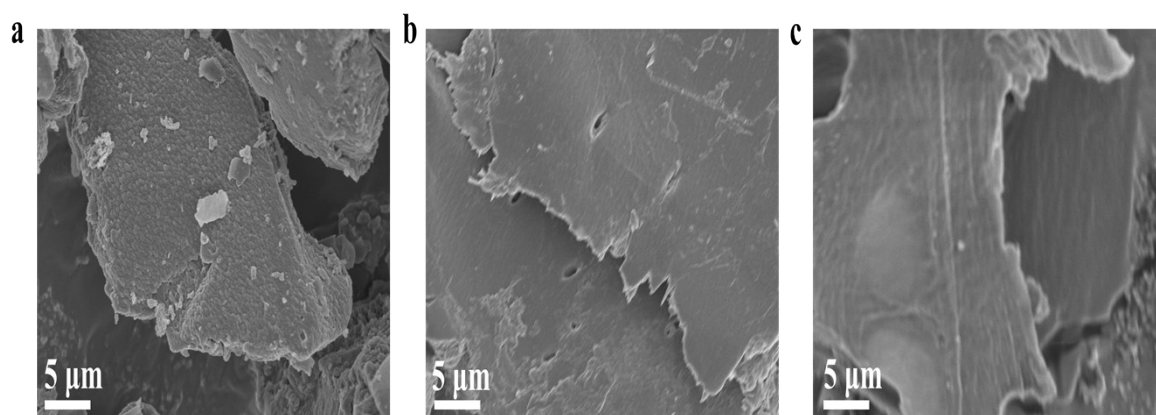

Fig. S3. SEM images of (a) PCN, (b) SA-Cu@PCN, (c) DAS-Cu@PCN

Table S1. ICP of the DAS-Cu@PCN catalyst

| Catalyst   | Sample quality $m_0$<br>(g) | Test element | Test solution element<br>concentration $C_0$<br>(mg/L) | Sample element<br>content Wt (%) |
|------------|-----------------------------|--------------|--------------------------------------------------------|----------------------------------|
| DAS-Cu@PCN | 0.0370                      | Cu           | 1.342                                                  | 0.9068                           |
|            | 0.0370                      | Cu           | 1.353                                                  | 0.9142                           |

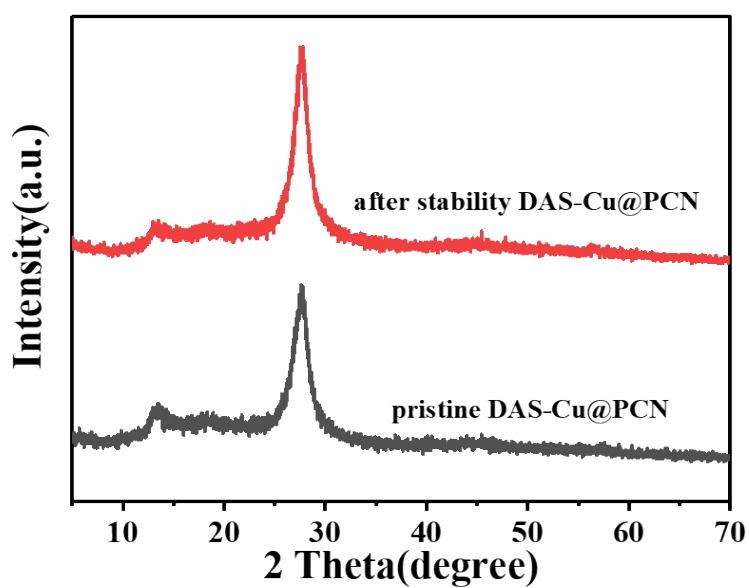

Figure S4. Comparison of XRD before and after reaction

Table S2. Surface composition of the PCN support and its Cu-containing derivatives DAS-Cu@PCN derived from XPS spectra

| Catalyst   | C/%   | N/%   | Cu/% | Cl/% |
|------------|-------|-------|------|------|
| PCN        | 43.4  | 56.6  | 0    | 0    |
| DAS-Cu@PCN | 44.35 | 55.52 | 0.08 | 0.05 |

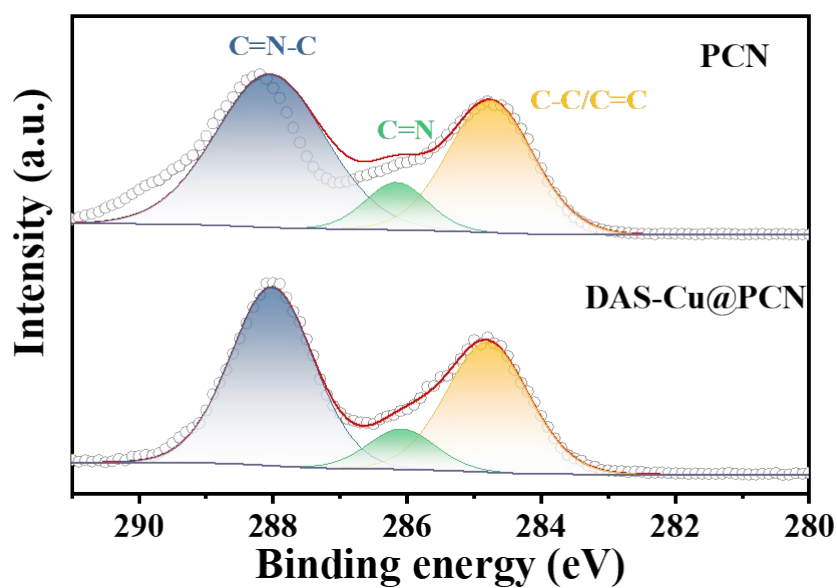

Fig. S5 The C 1s high-resolution XPS pattern of PCN and DAS-Cu@PCN

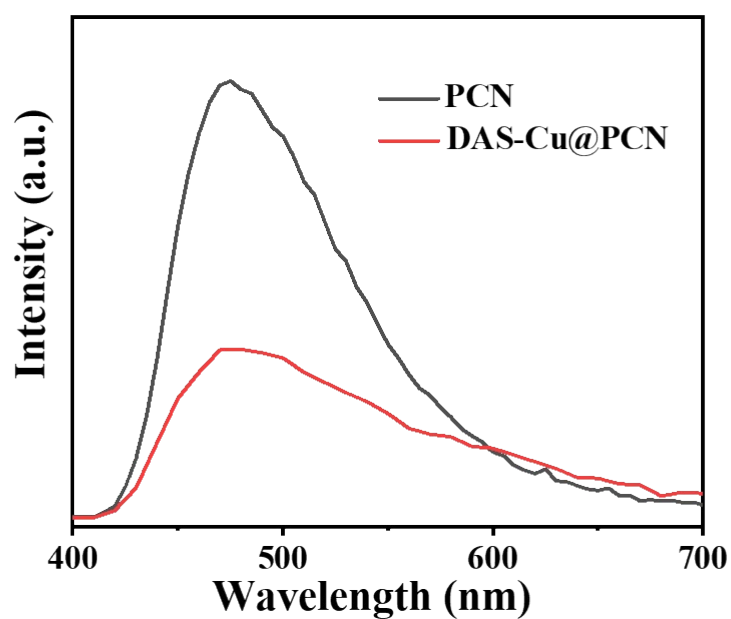

Fig. S6 Photoluminescence (PL) emission spectra of different samples ( $\lambda_{\text{exc}} = 375 \text{ nm}$ )

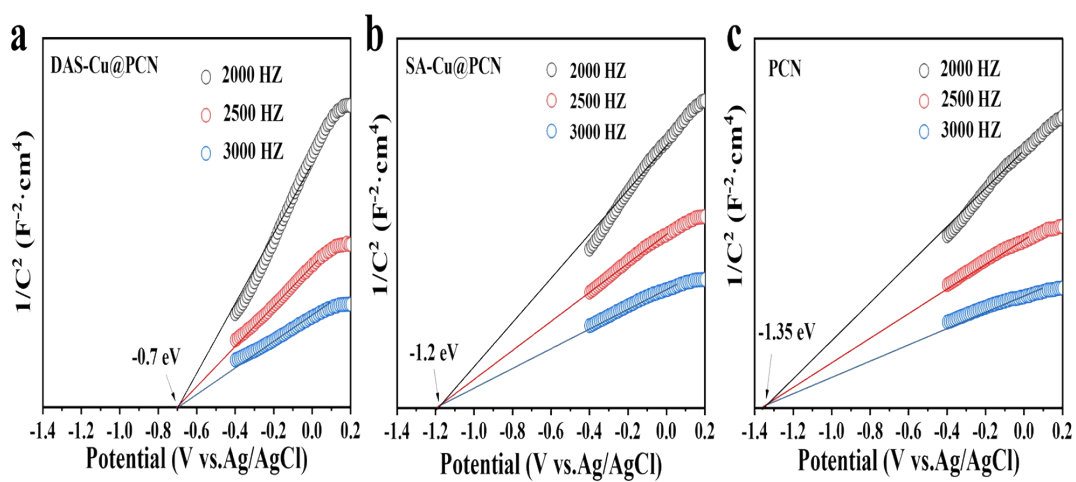

Fig. S7 Mott-Schottky plots of the (a) DAS-Cu@PCN, (b) SA-Cu@PCN, (c) PCN

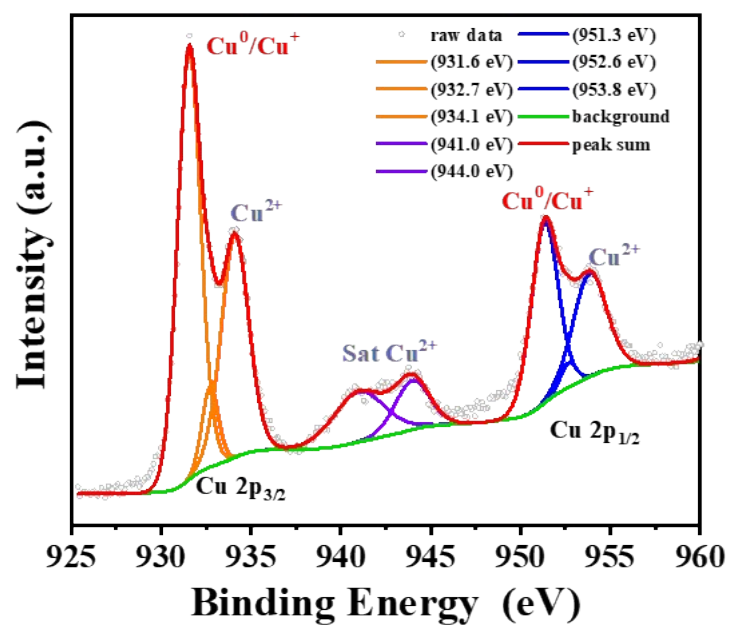

Fig. S8 Cu 2p XPS spectra of CuCl-bpy

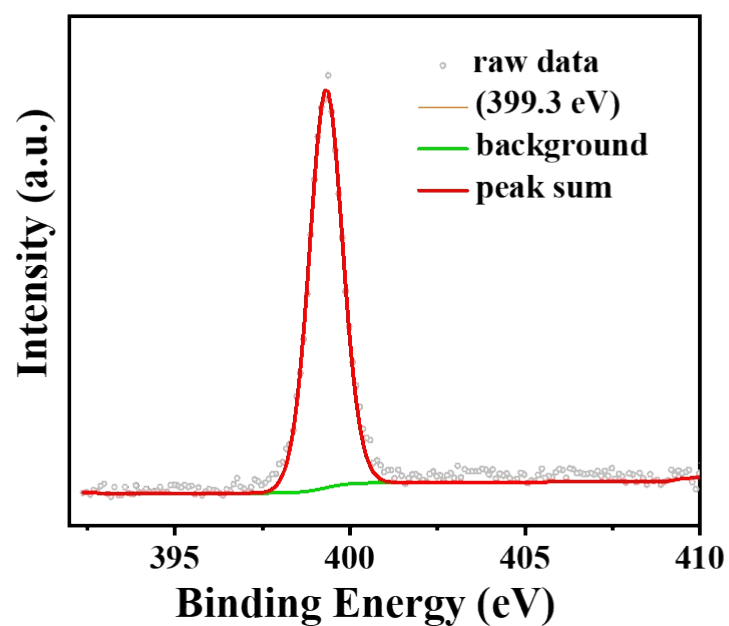

Fig. S9 N 1s XPS spectra of the CuCl-bpy

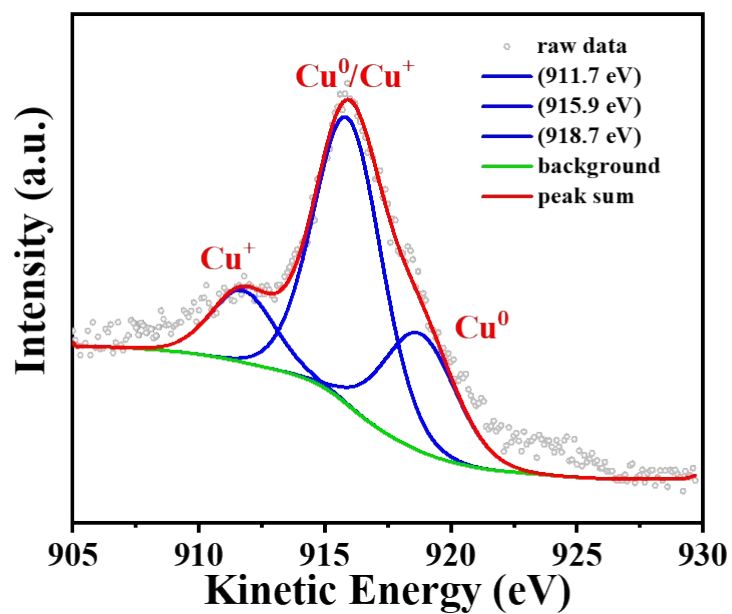

Fig. S10 Auger spectra of the CuCl-bpy

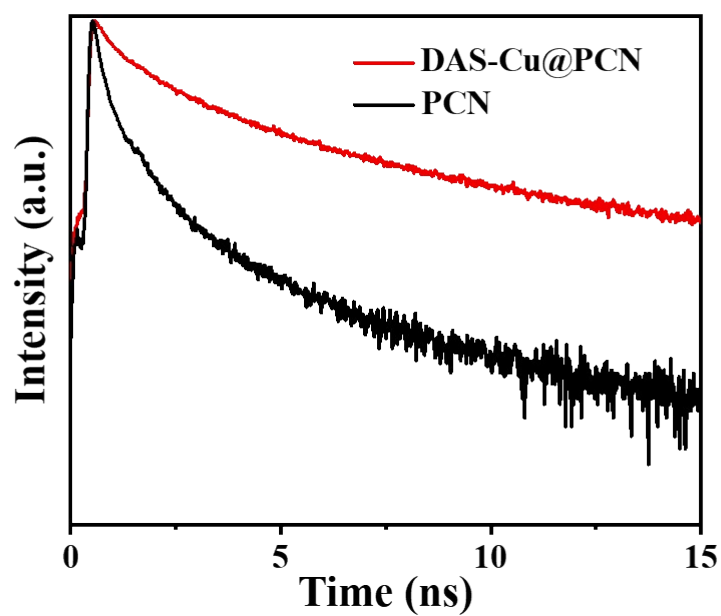

Fig. S11 Tr-PL spectra of different samples obtained at 375 nm excitation and probed at 450 nm.

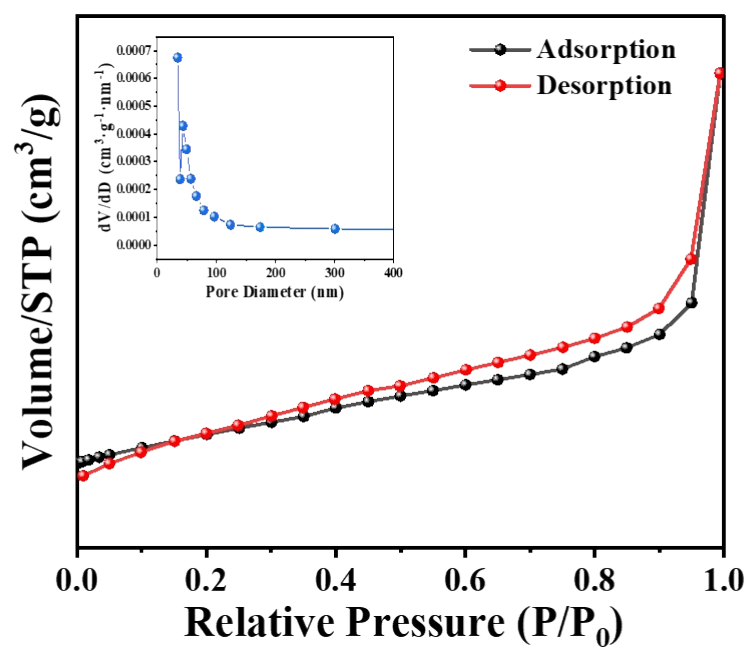

Fig. S12 Nitrogen adsorption and desorption isotherms of DAS-Cu@PCN and BJH pore size distribution curve (illustration)

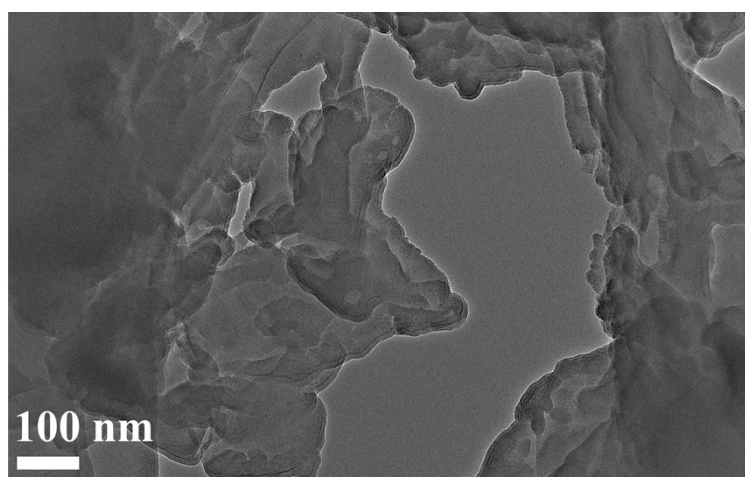

Fig. S13 TEM images of SA-Cu@PCN.



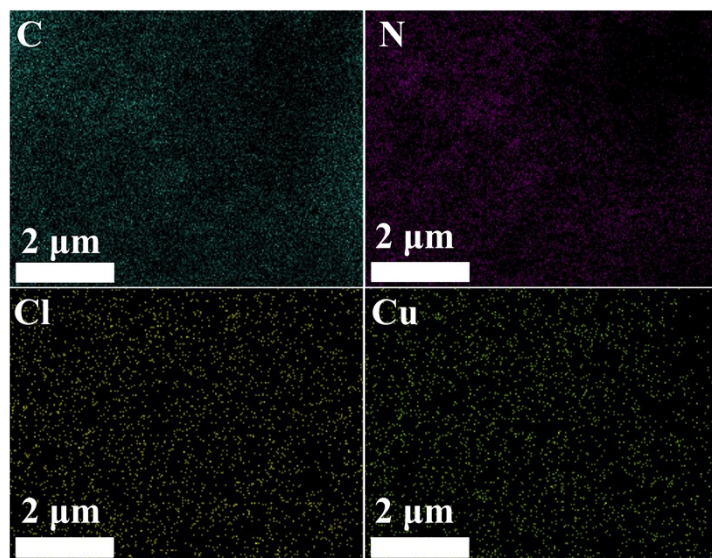

Fig. S14 Elemental mapping of SA-Cu@PCN.

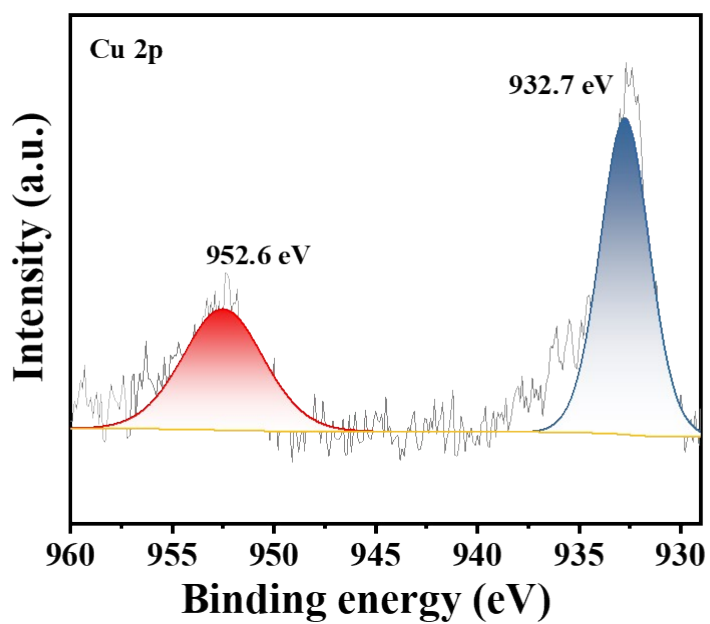

Fig. S15 XPS of Cu 2p in SA-Cu@PCN.
